# Supplementary material
Source: MDPI journal article supplement (https://www.mdpi.com/2077-0472/13/11/2138)
Supplement: s1 [file s1]

**Table S1**

List of analysed pesticides with their category of use (AC – acaricide, AL – algicide, VMP – veterinary medicinal product, FU – fungicide, HB – herbicide, IN – insecticide, MO – molluscicide, NE – nematocide, PG – plant growth regulator, RE – repellent, ST – soil treatment) and their metabolites (MET), and LOQ values.

| Compound                                         | Category | LOQ (mg/kg) | Compound                     | Category   | LOQ (mg/kg) |
|--------------------------------------------------|----------|-------------|------------------------------|------------|-------------|
| 1-Naphthylacetamide (NAD)                        | (1-PG    | 0.001       | Iodosulfuron-methyl-sodium   | HB         | 0.001       |
| 2,4-D                                            | HB, PG   | 0.01        | Ipconazole                   | FU         | 0.005       |
| 2,4-Dimethylanilin (DMA)                         | MET      | 0.1         | Iprodione                    | FU, NE     | 0.01        |
| N-2,4-Dimethylphenylformamide (DMF)              | MET      | 0.005       | Isoproturon                  | HB         | 0.005       |
| N-2,4-Dimethylphenyl-N'-methylformamidine (DMPF) | MET      | 0.01        | Isopyrazam                   | FU         | 0.001       |
| 6-Chloro-4-hydroxy-3-phenylpyridazine            | MET      | 0.001       | Isoxaflutole                 | HB         | 0.001       |
| Abamectin                                        | AC, IN   | 0.1         | Kresoxim-methyl              | FU         | 0.005       |
| Acetamiprid                                      | IN       | 0.001       | Lambda-Cyhalothrin           | IN         | 0.001       |
| Alpha-Cypermethrin                               | IN       | 0.005       | Lenacil                      | HB         | 0.001       |
| Amidosulfuron                                    | HB       | 0.001       | Linuron                      | HB         | 0.001       |
| Azoxystrobin                                     | FU       | 0.001       | Mandipropamid                | FU         | 0.001       |
| Bentazone                                        | HB       | 0.001       | Malathion                    | IN, AC     | 0.005       |
| 6-Hydroxy Bentazon                               | MET      | 0.01        | MCPA                         | HB         | 0.005       |
| Beta-Cyfluthrin                                  | IN       | 0.005       | MCPB                         | HB         | 0.1         |
| Bifenazate                                       | AC       | 0.01        | Mecoprop-P (MCP-P)           | HB         | 0.01        |
| Bifenox                                          | HB       | 0.005       | Mepanipyrim                  | FU         | 0.01        |
| Bifenthrin                                       | IN       | 0.005       | Mesosulfuron-methyl          | HB         | 0.001       |
| Bixafen                                          | FU       | 0.001       | Mesotrione                   | HB         | 0.005       |
| Boscalid                                         | FU       | 0.001       | Metaflumizone                | IN         | 0.01        |
| Bromopropylate                                   | VMP      | 0.001       | Metalaxyl-M/Metalaxyl        | FU         | 0.001       |
| Bromoxynil                                       | HB       | 0.01        | Metamitron                   | HB         | 0.005       |
| Bupirimate                                       | FU       | 0.001       | Metazachlor                  | HB         | 0.001       |
| Carbendazim                                      | FU       | 0.001       | Metconazole                  | FU, PG     | 0.005       |
| Carbetamide                                      | HB       | 0.001       | Methiocarb                   | IN, MO, RE | 0.001       |
| Carboxine                                        | FU       | 0.001       | Methiocarb sulfone           | MET        | 0.001       |
| Carfentrazone-ethyl                              | HB       | 0.001       | Methiocarb sulfoxide         | MET        | 0.001       |
| Chlorantraniliprole                              | IN       | 0.001       | Methoxyfenozide              | IN         | 0.005       |
| Chloridazon                                      | HB       | 0.001       | Methyl isothiocyanate (MITC) | MET        | 0.1         |
| Chlorothalonil                                   | FU       | 0.01        | Metrafenone                  | FU         | 0.005       |
| Chlorotoluron                                    | HB       | 0.001       | Metribuzin                   | HB         | 0.005       |
| Chlorpropham                                     | PG, HB   | 0.001       | Metsulfuron-methyl           | HB         | 0.001       |
| Chlorpyrifos                                     | IN, AC   | 0.001       | Myclobutanil                 | FU         | 0.1         |
| Chlorpyrifos-methyl                              | IN, AC   | 0.001       | Napropamide                  | HB         | 0.001       |
| Chlorsulfuron                                    | HB       | 0.001       | Nicosulfuron                 | HB         | 0.001       |
| Clethodim                                        | HB       | 0.005       | Nitenpyram                   | IN         | 0.005       |
| Clofentezine                                     | AC       | 0.005       | Novaluron                    | IN         | 0.01        |

|                        |        |       |                              |         |        |
|------------------------|--------|-------|------------------------------|---------|--------|
| Clomazone              | HB     | 0.001 | Oxyfluorfen                  | HB      | 0.01   |
| Clothianidin           | IN     | 0.005 | Pencycuron                   | FU      | 0.001  |
| Coumaphos              | VMP    | 0.001 | Pendimethalin                | HB      | 0.001  |
| Cyazofamid             | FU     | 0.005 | Pethoxamid                   | HB      | 0.001  |
| Cycloxydim             | HB     | 0.01  | Phenmedipham                 | HB      | 0.005  |
| Cyflufenamid           | FU     | 0.001 | Phosmet                      | IN      | 0.005  |
| Cymiazol               | VMP    | 0.005 | Picoxystrobin                | FU      | 0.001  |
| Cymoxanil              | FU     | 0.005 | Pirimicarb                   | IN      | 0.001  |
| Cyproconazole          | FU     | 0.005 | Pirimicarb-desmethyl         | MET     | 0.001  |
| Cyprodinil             | FU     | 0.01  | Pirimiphos-methyl            | IN      | 0.001  |
| Deltamethrin           | IN     | 0.005 | Prochloraz                   | FU      | 0.005  |
| Desmedipham            | HB     | 0.001 | Propamocarb                  | FU      | 0.005  |
| Dichlorprop-P (2,4-DP) | HB     | 0.01  | Propaquizafop                | HB      | 0.001  |
| Difenoconazole         | FU     | 0.001 | Propiconazole                | FU      | 0.005  |
| Diiflubenzuron         | IN     | 0.001 | Propoxycarbazone-sodium      | HB      | 0.005  |
| Diiflufenican          | HB     | 0.005 | Propyzamide                  | HB      | 0.001  |
| Dimethachlor           | HB     | 0.001 | Proquinazid                  | FU      | 0.005  |
| Dimethoate             | IN, AC | 0.001 | Prosulfocarb                 | HB      | 0.005  |
| Dimethomorph           | FU     | 0.001 | Prothioconazole              | FU      | 0.1    |
| Dimoxystrobin          | FU     | 0.001 | Prothioconazole-desthio      | MET     | 0.001  |
| Dithianon              | FU     | 0.1   | Pyraclostrobin               | FU, PG  | 0.001  |
| Epoxiconazole          | FU     | 0.001 | Pyridate                     | HB      | 0.005  |
| Esfenvalerate          | IN     | 0.005 | Pyrimethanil                 | FU      | 0.005  |
| Ethofumesate           | HB     | 0.01  | Pyriproxyfen                 | IN      | 0.005  |
| Ethoprophos            | NE, IN | 0.001 | Quinoclamine                 | AL, HB  | 0.005  |
| Etofenprox             | IN     | 0.001 | Quinoxifen                   | FU      | 0.01   |
| Etoxazole              | IN     | 0.005 | Quizalofop-P-ethyl           | HB      | 0.005  |
| Famoxadone             | FU     | 0.005 | Quizalofop-P-tefuryl         | HB      | 0.01   |
| Fenazaquin             | AC     | 0.001 | Rimsulfuron                  | HB      | 0.001  |
| Fenbuconazole          | FU     | 0.005 | S-Metolachlor                | HB      | 0.001  |
| Fenhexamid             | FU     | 0.01  | Silthiofam                   | FU      | 0.001  |
| Fenoxaprop-P-ethyl     | HB     | 0.005 | Spinosyn A                   | IN      | 0.0008 |
| Fenpropidin            | FU     | 0.005 | Spinosyn D                   | IN      | 0.0012 |
| Fenpropimorph          | FU     | 0.005 | Spirodiclofen                | AC, IN  | 0.005  |
| Fenpyroximate          | AC     | 0.005 | Spirotetramat                | IN      | 0.001  |
| Fipronil               | IN     | 0.001 | Spirotetramat-enol           | MET     | 0.001  |
| Fipronil-carboxamide   | MET    | 0.001 | Spirotetramat-enol-glucoside | MET     | 0.001  |
| Fipronil-desulfinyl    | MET    | 0.005 | Spirotetramat-keto-hydroxy   | MET     | 0.01   |
| Fipronil-sulfide       | MET    | 0.001 | Spiroxamine                  | FU      | 0.001  |
| Fipronil-sulfone       | MET    | 0.001 | Sulcotrione                  | HB      | 0.01   |
| Flazasulfuron          | HB     | 0.001 | Sulfosulfuron                | HB      | 0.001  |
| Flonicamid             | IN     | 0.01  | tau-Fluwalinate              | IN, VMP | 0.005  |
| Florasulam             | HB     | 0.001 | Tebuconazole                 | FU      | 0.001  |
| Fluazifop-P-butyl      | HB     | 0.005 | Tebufenozide                 | IN      | 0.1    |
| Fluazinam              | FU     | 0.005 | Tebufenpyrad                 | AC      | 0.005  |
| Fludioxonil            | FU     | 0.001 | Teflubenzuron                | IN      | 0.01   |
| Flufenacet             | HB     | 0.001 | Tefluthrin                   | IN      | 0.001  |
| Fluquinconazole        | FU     | 0.001 | Tembotrione                  | HB      | 0.01   |
| Flurochloridon         | HB     | 0.005 | Tepraloxymid                 | HB      | 0.01   |
| Fluroxypyr             | HB     | 0.1   | Terbuthylazine               | HB      | 0.005  |

|                                 |        |       |                       |     |       |
|---------------------------------|--------|-------|-----------------------|-----|-------|
| Fluroxypyr-1-methylheptyl ester | MET    | 0.01  | Tetraconazole         | FU  | 0.005 |
| Flusilazole                     | FU     | 0.001 | Thiacloprid           | IN  | 0.001 |
| Flutriafol                      | FU     | 0.01  | Thiacloprid-amide     | MET | 0.001 |
| Foramsulfuron                   | HB     | 0.001 | Thiamethoxam          | IN  | 0.005 |
| Gibberellin A4                  | PG     | 0.1   | Thifensulfuron-methyl | HB  | 0.001 |
| Hexythiazox                     | AC, IN | 0.005 | Thiophanate-methyl    | FU  | 0.001 |
| Hymexazol                       | FU     | 0.1   | Tralkoxidym           | HB  | 0.005 |
| Imazalil                        | FU     | 0.005 | Triadimenol           | FU  | 0.01  |
| Imidacloprid                    | IN     | 0.001 | Tribenuron-methyl     | HB  | 0.1   |
| Imidacloprid-olefin             | MET    | 0.001 | Trifloxystrobin       | FU  | 0.001 |
| Imidacloprid-urea               | MET    | 0.001 | Triflusulfuron-methyl | HB  | 0.005 |
| 6-Chloronicotinic acid          | MET    | 0.1   | Trinexapac-ethyl      | PG  | 0.1   |
| Indole-3-butyric acid (IBA)     | PG     | 0.01  | Triticonazole         | FU  | 0.005 |
| Indoxacarb                      | IN     | 0.005 | zeta-Cypermethrin     | IN  | 0.005 |

---
